# Supplementary material
Source: publisher figshare collection journal article supplement (https://frontiersin.figshare.com/ndownloader/files/26008898)
Supplement: Supplementary file [file 26008898]

A

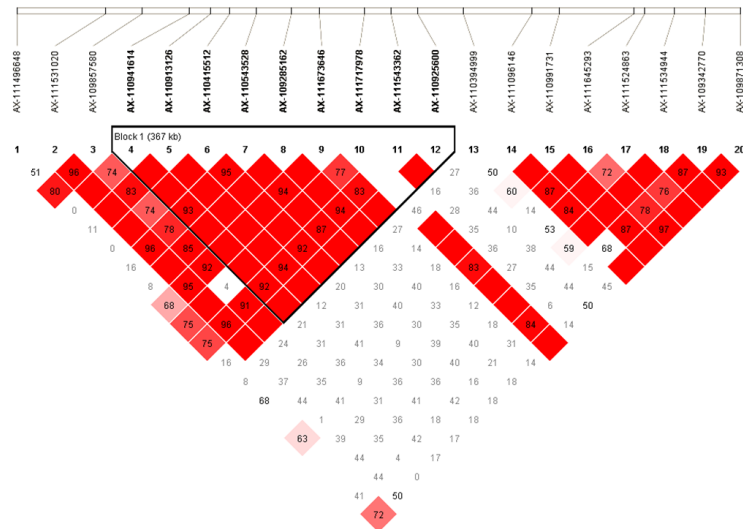

B

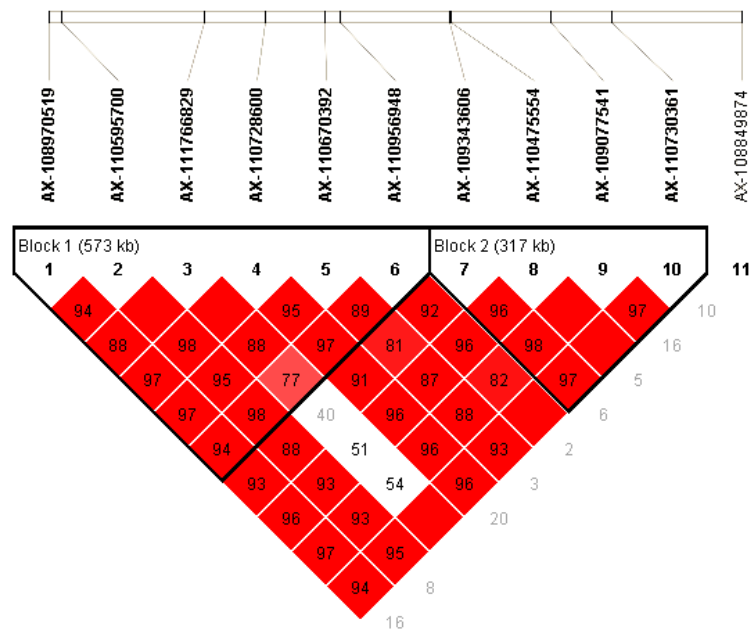

**Figure S2** Haploblock for local LD decay within the candidate region on chromosomes 2B and 7A
